# Supplementary material
Source: Research Square preprint supplement (doi:10.21203/rs.3.rs-10308785/v1)
Supplement: Supplementary file 1 [file 42d4a51aa5855e863318a691.docx]

| **HOUR** | **HARDWARE STORE** | | | | | | | | | | | | | | | **BAKERY** | | | | | | | | | | | | | | | | | | | | | **GROCERY STORE** | | |
| --- | --- | --- | --- | --- | --- | --- | --- | --- | --- | --- | --- | --- | --- | --- | --- | --- | --- | --- | --- | --- | --- | --- | --- | --- | --- | --- | --- | --- | --- | --- | --- | --- | --- | --- | --- | --- | --- | --- | --- |
| **WB** | | | **SH** | | | **KS** | | | **US** | | | **TF** | | | **TF** | | | **WB T** | | | **KS** | | | **WB SB** | | | **KS** | | | **BM** | | | **TAP** | | | **KS** | | |
| **L** | **σ** | ***n*** | **L** | **σ** | ***n*** | **L** | **σ** | ***n*** | **L** | **σ** | ***n*** | **L** | **σ** | ***n*** | **L** | **σ** | ***n*** | **L** | **σ** | ***n*** | **L** | **σ** | ***n*** | **L** | **σ** | ***n*** | **L** | **σ** | ***n*** | **L** | **σ** | ***n*** | **L** | **σ** | ***n*** | **L** | **σ** | ***n*** |
| 00:00 |  |  |  |  |  |  |  |  |  |  |  |  |  |  |  | 5 | 0.1 | 3 |  |  |  | 3.5 | 3 | 24 | 0 | 0 | 7 | 0 | 0 | 1 | 0 | 0 | 1 | 2 | 0 | 1 |  |  |  |
| 01:00 |  |  |  |  |  |  |  |  |  |  |  |  |  |  |  |  |  |  |  |  |  | 0.4 | 0 | 5 | 0 | 0 | 2 |  |  |  | 0 | 0 | 1 | 0 | 0 | 1 |  |  |  |
| 02:00 |  |  |  |  |  |  |  |  |  |  |  |  |  |  |  | 5 | 0 | 1 | 0 | 0 | 1 | 3 | 3 | 3 | 0 | 1 | 7 |  |  |  | 0 | 0 | 1 | 2 | 0 | 1 |  |  |  |
| 03:00 |  |  |  |  |  |  |  |  |  |  |  |  |  |  |  | 2 | 0 | 1 | 1 | 1 | 1 | 3.1 | 4 | 7 | 1 | 0 | 9 | 2 | 0 | 1 | 0 | 0 | 1 | 2 | 0 | 1 |  |  |  |
| 04:00 |  |  |  |  |  |  |  |  |  |  |  |  |  |  |  |  |  |  |  |  |  | 9.6 | 7 | 37 | 0 | 0 | 5 | 0 | 0 | 1 | 0 | 0 | 1 | 3 | 0 | 1 |  |  |  |
| 05:00 |  |  |  |  |  |  |  |  |  |  |  |  |  |  |  |  |  |  |  |  |  | 4.8 | 6 | 33 | 0 | 0 | 2 |  |  |  | 0 | 0 | 1 | 1 | 0 | 1 |  |  |  |
| 06:00 |  |  |  |  |  |  |  |  |  |  |  |  |  |  |  | 8 | 3.8 | 18 | 2 | 1 | 24 | 112 | 37 | 509 | 2 | 1 | 64 | 7 | 5 | 28 | 3 | 0 | 1 | 33 | 0 | 1 | 22.6 | 16 | 257 |
| 07:00 | 4 | 2 | 65 | 17 | 8 | 3 | 8 | 5 | 144 | 5 | 5 | 24 | 37 | 0 | 14 | 17 | 6.9 | 30 | 2 | 1 | 32 | 105 | 34 | 722 | 2 | 1 | 50 | 29 | 14 | 85 | 4 | 0 | 1 | 39 | 0 | 1 | 18.5 | 13 | 287 |
| 08:00 | 6 | 4 | 75 | 6 | 0 | 2 | 7 | 4 | 93 | 9 | 9 | 27 | 31 | 0 | 21 | 26 | 9.5 | 40 | 3 | 1 | 38 | 119 | 45 | 989 | 3 | 1 | 102 | 26 | 13 | 67 | 4 | 0 | 1 | 45 | 0 | 1 | 32.4 | 12 | 241 |
| 09:00 | 1 | 0 | 39 |  |  |  | 1 | 1 | 15 | 2 | 2 | 16 | 4 | 0 | 10 | 35 | 13 | 45 | 10 | 8 | 76 | 138 | 64 | 850 | 5 | 1 | 124 | 58 | 35 | 172 | 6 | 0 | 1 | 62 | 0 | 1 | 20.1 | 19 | 116 |
| 10:00 | 2 | 2 | 63 |  |  |  | 1 | 1 | 22 | 5 | 5 | 17 | 9 | 0 | 15 | 34 | 13 | 43 | 8 | 7 | 33 | 164 | 55 | 990 | 5 | 2 | 103 | 40 | 23 | 145 | 6 | 0 | 1 | 63 | 0 | 1 | 22.5 | 19 | 125 |
| 11:00 | 4 | 2 | 79 |  |  |  | 8 | 4 | 118 | 10 | 10 | 32 | 24 | 0 | 12 | 29 | 14 | 53 | 4 | 2 | 34 | 106 | 63 | 644 | 4 | 2 | 115 | 25 | 26 | 59 | 4 | 0 | 1 | 42 | 0 | 1 | 22.4 | 19 | 122 |
| 12:00 | 6 | 3 | 73 | 21 | 30 | 6 | 12 | 6 | 135 | 2 | 2 | 16 | 45 | 0 | 13 | 40 | 15 | 54 | 4 | 3 | 41 | 106 | 84 | 588 | 3 | 1 | 103 | 18 | 13 | 95 | 4 | 0 | 1 | 43 | 0 | 1 | 5 | 5 | 57 |
| 13:00 | 9 | 3 | 90 |  |  |  | 10 | 8 | 102 | 6 | 6 | 24 | 28 | 0 | 14 | 42 | 8.7 | 55 | 7 | 5 | 55 | 197 | 45 | 1235 | 4 | 1 | 110 | 37 | 17 | 107 | 7 | 0 | 1 | 72 | 0 | 1 | 16.7 | 27 | 82 |
| 14:00 | 7 | 6 | 51 |  |  |  | 12 | 6 | 82 | 8 | 8 | 26 | 29 | 0 | 15 | 27 | 11 | 40 | 4 | 3 | 36 | 119 | 25 | 1040 | 5 | 2 | 139 | 26 | 21 | 91 | 4 | 0 | 1 | 46 | 0 | 1 | 24.9 | 17 | 106 |
| 15:00 | 3 | 2 | 81 | 29 | 0 | 1 | 11 | 13 | 110 | 21 | 21 | 47 | 72 | 0 | 16 | 34 | 17 | 47 | 5 | 3 | 45 | 190 | 51 | 1209 | 5 | 3 | 119 | 34 | 26 | 109 | 7 | 0 | 1 | 68 | 0 | 1 | 33.8 | 27 | 117 |
| 16:00 | 7 | 4 | 94 | 14 | 5 | 14 | 6 | 4 | 77 | 8 | 8 | 50 | 39 | 0 | 17 | 25 | 19 | 32 | 4 | 4 | 43 | 185 | 46 | 1085 | 1 | 1 | 38 | 5 | 4 | 24 | 5 | 0 | 1 | 55 | 0 | 1 | 16.7 | 14 | 71 |
| 17:00 | 4 | 3 | 76 | 25 | 5 | 15 | 1 | 1 | 15 | 0 | 0 | 7 | 34 | 0 | 18 | 26 | 13 | 42 | 2 | 2 | 32 | 195 | 93 | 1036 | 1 | 1 | 22 | 5 | 6 | 29 | 6 | 0 | 1 | 58 | 0 | 1 | 14.9 | 14 | 59 |
| 18:00 |  |  |  |  |  |  |  |  |  |  |  |  |  |  |  | 32 | 11 | 45 | 2 | 1 | 41 | 207 | 94 | 983 | 1 | 0 | 15 | 10 | 10 | 54 | 6 | 0 | 1 | 63 | 0 | 1 | 27.5 | 23 | 115 |
| 19:00 |  |  |  |  |  |  |  |  |  |  |  |  |  |  |  | 30 | 17 | 45 | 6 | 4 | 59 | 134 | 66 | 463 | 1 | 1 | 19 | 44 | 12 | 128 | 5 | 0 | 1 | 54 | 0 | 1 | 31.6 | 37 | 94 |
| 20:00 |  |  |  |  |  |  |  |  |  |  |  |  |  |  |  | 77 | 144 | 32 | 8 | 8 | 29 | 23 | 18 | 226 | 0 | 0 | 10 | 16 | 17 | 52 | 3 | 0 | 1 | 31 | 0 | 1 | 23 | 27 | 63 |
| 21:00 |  |  |  |  |  |  |  |  |  |  |  |  |  |  |  | 23 | 12 | 34 | 5 | 4 | 39 | 139 | 50 | 914 | 2 | 0 | 8 | 21 | 12 | 74 | 5 | 0 | 1 | 48 | 0 | 1 | 43.1 | 36 | 87 |
| 22:00 |  |  |  |  |  |  |  |  |  |  |  |  |  |  |  | 47 | 97 | 12 | 1 | 1 | 12 | 38 | 20 | 303 |  |  |  | 6 | 3 | 30 | 2 | 0 | 1 | 23 | 0 | 1 | 2 | 0 | 2 |
| 23:00 |  |  |  |  |  |  |  |  |  |  |  |  |  |  |  |  |  |  |  |  |  | 12 | 9 | 128 |  |  |  |  |  |  |  |  |  |  |  |  |  |  |  |
| **AVERAGE** | **5** |  |  | **19** |  |  | **7** |  |  | **7** |  |  | **32** |  |  | **28** |  |  | **4** |  |  | **96** |  |  | **2** |  |  | **20** |  |  | **4** |  |  | **37** |  |  | **22.2** |  |  |

Table continues on next page.

| **HOUR** | **DRUGSTORE** | | | | | | | | | | | | **BEAUTY SALON** | | | | | | | | | | | | | | | | | | **BAR** | | | | | | | | | | | | | **PET SHOP** | | | | | | | | | | | | | | | **RB** |
| --- | --- | --- | --- | --- | --- | --- | --- | --- | --- | --- | --- | --- | --- | --- | --- | --- | --- | --- | --- | --- | --- | --- | --- | --- | --- | --- | --- | --- | --- | --- | --- | --- | --- | --- | --- | --- | --- | --- | --- | --- | --- | --- | --- | --- | --- | --- | --- | --- | --- | --- | --- | --- | --- | --- | --- | --- | --- | --- | --- |
| **TF** | | | **WB** | | | **KS** | | | **US** | | | **HW** | | | **WB S** | | | **WF + KS** | | | **WB T** | | | **TF** | | | **TAP** | | | **TF** | | | **WB** | | **KS** | | | | | **TAP** | | | **PS** | | | **WB/TAP** | | | **SH** | | | **PC** | | | **TF** | | | **TOTAL** |
| **L** | **σ** | ***n*** | **L** | **σ** | ***n*** | **L** | **σ** | ***n*** | **L** | **σ** | ***n*** | **L** | **σ** | ***n*** | **L** | **σ** | ***n*** | **L** | **σ** | ***n*** | **L** | **σ** | ***n*** | **L** | **σ** | ***n*** | **L** | **σ** | ***n*** | **L** | **σ** | ***n*** | **L** | **σ** | ***n*** | **L** | **σ** | ***n*** | **L** | | **σ** | ***n*** | **L** | **σ** | ***n*** | **L** | **σ** | ***n*** | **L** | **σ** | ***n*** | **L** | **σ** | ***n*** | **L** | **σ** | ***n*** | **(L)** |
| 00:00 |  |  |  |  |  |  |  |  |  |  |  |  |  |  |  |  |  |  |  |  |  |  |  |  |  |  |  |  |  |  | 23 | 17 | 38 | 3 | 4 | 28 | 26 | 21 | 85 | 5 | | 0 | 1 |  |  |  |  |  |  |  |  |  |  |  |  |  |  |  | 68.1 |
| 01:00 |  |  |  |  |  |  |  |  |  |  |  |  |  |  |  |  |  |  |  |  |  |  |  |  |  |  |  |  |  |  | 10 | 6 | 8 | 1 | 0 | 14 | 9 | 9 | 39 | 2 | | 0 | 1 |  |  |  |  |  |  |  |  |  |  |  |  |  |  |  | 23.5 |
| 02:00 |  |  |  |  |  |  |  |  |  |  |  |  |  |  |  |  |  |  |  |  |  |  |  |  |  |  |  |  |  |  |  |  |  |  |  |  | 0 | 0 | 1 |  | |  |  |  |  |  |  |  |  |  |  |  |  |  |  |  |  |  | 11.3 |
| 03:00 |  |  |  |  |  |  |  |  |  |  |  |  |  |  |  |  |  |  |  |  |  |  |  |  |  |  |  |  |  |  |  |  |  |  |  |  |  |  |  |  | |  |  |  |  |  |  |  |  |  |  |  |  |  |  |  |  |  | 10.4 |
| 04:00 |  |  |  |  |  |  |  |  |  |  |  |  |  |  |  |  |  |  |  |  |  |  |  |  |  |  |  |  |  |  |  |  |  |  |  |  |  |  |  |  | |  |  |  |  |  |  |  |  |  |  |  |  |  |  |  |  |  | 12.6 |
| 05:00 |  |  |  |  |  |  |  |  |  |  |  |  |  |  |  |  |  |  |  |  |  |  |  |  |  |  |  |  |  |  |  |  |  |  |  |  |  |  |  |  | |  |  |  |  |  |  |  |  |  |  |  |  |  |  |  |  |  | 6.4 |
| 06:00 | 9 | 0 | 1 |  |  |  |  |  |  |  |  |  | 0 |  | 1 |  |  |  |  |  |  |  |  |  |  |  |  |  |  |  |  |  |  |  |  |  |  |  |  |  | |  |  |  |  |  |  |  |  |  |  |  |  |  |  |  |  |  | 199 |
| 07:00 | 7 | 3 | 9 |  |  |  | 2.4 | 0 | 61 | 1.2 | 0 | 17 | 12 | 9 | 1 | 19 | 13 | 230 | 0 | 0 | 49 |  |  |  |  |  |  |  |  |  |  |  |  |  |  |  | 5 | 4 | 5 | 0 | | 0 | 1 |  |  |  |  |  |  |  |  |  | 3 | 1 | 16 | 5 | 0 | 1 | 341 |
| 08:00 | 6 | 4 | 3 | 1.5 | 0 | 8 | 2.2 | 1 | 37 | 0.9 | 2 | 11 | 24 | 22 | 1 | 52 | 26 | 356 |  |  |  | 3 | 2 | 22 | 5 | 6 | 6 | 1 | 1 | 4 | 3 | 1 | 4 | 0 | 0 | 5 | 7 | 5 | 48 | 1 | | 0 | 1 | 58 | 34 | 158 | 2 | 2 | 48 |  |  |  | 5 | 3 | 104 | 13 | 7 | 21 | 499 |
| 09:00 | 7 | 5 | 9 |  |  |  | 1.4 | 1 | 21 | 0.4 | 1 | 3 | 17 | 7 | 4 | 24 | 28 | 376 |  |  |  | 5 | 3 | 38 | 2 | 1 | 2 | 2 | 1 | 14 | 5 | 2 | 15 | 1 | 0 | 5 | 19 | 15 | 237 | 2 | | 0 | 1 | 79 | 34 | 238 | 4 | 2 | 53 |  |  |  | 3 | 3 | 54 | 11 | 5 | 18 | 523 |
| 10:00 | 11 | 3 | 12 |  |  |  | 0.8 | 2 | 23 | 0.1 | 1 | 9 | 19 | 13 | 23 | 26 | 28 | 410 |  |  |  | 1 | 1 | 16 | 4 | 3 | 4 |  |  |  | 7 | 4 | 28 | 1 | 0 | 18 | 19 | 12 | 341 | 2 | | 0 | 1 | 78 | 40 | 179 | 1 | 1 | 39 |  |  |  | 3 | 3 | 26 | 14 | 7 | 18 | 544 |
| 11:00 | 8 | 3 | 12 |  |  |  | 1.1 | 1 | 34 | 0.1 | 0 | 4 | 30 | 44 | 55 | 26 | 31 | 428 |  |  |  | 1 | 0 | 18 | 3 | 0 | 3 |  |  |  | 7 | 4 | 27 | 1 | 0 | 14 | 20 | 20 | 370 | 2 | | 0 | 1 | 65 | 27 | 157 | 1 | 1 | 47 |  |  |  | 1 | 1 | 8 | 22 | 13 | 29 | 472 |
| 12:00 | 8 | 3 | 9 | 3.2 | 0 | 2 | 2.6 | 1 | 36 | 0.3 | 0 | 4 | 11 | 11 | 57 | 25 | 29 | 483 |  |  |  | 2 | 1 | 18 | 3 | 2 | 5 |  |  |  | 5 | 3 | 17 | 3 | 3 | 18 | 18 | 10 | 352 | 2 | | 0 | 1 | 36 | 32 | 64 | 1 | 1 | 58 | 1 | 0 | 1 | 6 | 3 | 99 | 26 | 13 | 36 | 463 |
| 13:00 | 11 | 5 | 13 | 2.5 | 2 | 19 | 3.7 | 2 | 58 | 0.6 | 0 | 18 | 25 | 24 | 42 | 11 | 8 | 391 |  |  |  | 0 | 0 | 7 | 4 | 3 | 3 | 1 | 0 | 1 | 6 | 3 | 20 | 2 | 1 | 19 | 26 | 22 | 510 | 3 | | 0 | 1 | 41 | 29 | 114 | 2 | 1 | 59 |  |  |  | 7 | 3 | 133 | 27 | 8 | 34 | 608 |
| 14:00 | 11 | 6 | 17 | 1.7 | 1 | 5 | 4.1 | 2 | 63 | 0.1 | 1 | 10 | 34 | 29 | 18 | 18 | 19 | 509 | 0 | 0 | 84 | 2 | 2 | 26 | 9 | 13 | 8 | 2 | 0 | 2 | 9 | 5 | 30 | 1 | 1 | 37 | 38 | 34 | 260 | 4 | | 0 | 1 | 40 | 40 | 117 | 1 | 1 | 31 |  |  |  | 3 | 4 | 18 | 17 | 8 | 23 | 506 |
| 15:00 | 10 | 9 | 14 | 1.8 | 1 | 3 | 1.1 | 2 | 26 | 0.5 | 0 | 10 | 19 | 15 | 31 | 13 | 11 | 335 |  |  |  | 2 | 1 | 30 | 5 | 6 | 7 |  |  |  | 6 | 7 | 27 | 5 | 8 | 43 | 4 | 6 | 23 | 1 | | 0 | 1 | 36 | 33 | 75 | 2 | 1 | 61 |  |  |  | 2 | 3 | 32 | 17 | 6 | 24 | 637 |
| 16:00 | 14 | 6 | 15 | 0.3 | 0 | 1 | 2.2 | 1 | 16 | 0.2 | 1 | 13 | 23 | 22 | 40 | 12 | 8 | 380 | 0 | 0 | 43 | 4 | 6 | 18 | 3 | 3 | 8 |  |  |  | 4 | 2 | 9 | 2 | 3 | 19 | 2 | 2 | 53 | 1 | | 0 | 1 | 36 | 42 | 55 | 1 | 1 | 39 | 1 | 0 | 1 | 1 | 1 | 14 | 17 | 11 | 21 | 493 |
| 17:00 | 9 | 5 | 11 |  |  |  | 1.6 | 1 | 35 | 0.2 | 0 | 10 | 16 | 9 | 48 | 12 | 11 | 348 | 0 | 0 | 18 | 1 | 0 | 11 | 3 | 3 | 9 |  |  |  | 9 | 6 | 34 | 2 | 1 | 38 | 5 | 5 | 150 | 1 | | 0 | 1 | 27 | 24 | 14 | 2 | 2 | 42 | 2 | 2 | 3 | 2 | 1 | 30 | 22 | 12 | 28 | 488 |
| 18:00 | 8 | 7 | 14 |  |  |  | 1.3 | 1 | 34 | 0.1 | 0 | 6 | 3 | 4 | 47 | 20 | 19 | 468 |  |  |  | 1 | 1 | 17 | 1 | 1 | 9 |  |  |  | 11 | 8 | 57 | 1 | 1 | 43 | 7 | 7 | 129 | 2 | | 0 | 1 | 5 | 6 | 8 | 1 | 1 | 37 | 7 | 0 | 2 | 2 | 2 | 22 | 23 | 15 | 26 | 441 |
| 19:00 | 10 | 9 | 11 |  |  |  | 1.7 | 1 | 34 | 0.3 | 0 | 7 | 1 | 1 | 26 | 22 | 22 | 402 | 0 | 0 | 20 | 2 | 0 | 1 | 1 | 0 | 9 |  |  |  | 19 | 26 | 110 | 9 | 19 | 81 | 6 | 7 | 133 | 3 | | 0 | 1 |  |  |  | 0 | 0 | 3 |  |  |  | 0 |  | 1 | 7 | 2 | 3 | 387 |
| 20:00 | 8 | 3 | 12 |  |  |  | 2.4 | 2 | 31 | 0.1 | 0 | 13 |  |  |  | 43 | 0 | 385 | 0 | 0 | 26 |  |  |  |  |  |  |  |  |  | 29 | 35 | 144 | 6 | 8 | 85 | 7 | 7 | 125 | 4 | | 0 | 1 |  |  |  |  |  |  |  |  |  |  |  |  |  |  |  | 280 |
| 21:00 | 10 | 4 | 14 | 0.8 | 0 | 3 | 1.6 | 4 | 9 | 1 | 0 | 11 |  |  |  | 49 | 0 | 427 |  |  |  |  |  |  |  |  |  |  |  |  | 27 | 34 | 144 | 3 | 2 | 111 | 10 | 12 | 119 | 4 | | 0 | 1 |  |  |  |  |  |  |  |  |  |  |  |  |  |  |  | 390 |
| 22:00 | 6 | 2 | 5 |  |  |  | 0.1 | 1 | 1 | 0 | 2 | 4 |  |  |  | 68 | 0 | 419 |  |  |  |  |  |  |  |  |  |  |  |  | 24 | 21 | 137 | 3 | 2 | 99 | 7 | 9 | 110 | 3 | | 0 | 1 |  |  |  |  |  |  |  |  |  |  |  |  |  |  |  | 229 |
| 23:00 |  |  |  |  |  |  |  |  |  |  |  |  |  |  |  |  |  |  |  |  |  |  |  |  |  |  |  |  |  |  | 26 | 34 | 78 | 2 | 4 | 60 | 9 | 14 | 79 | 3 | | 0 | 1 |  |  |  |  |  |  |  |  |  |  |  |  |  |  |  | 52.7 |
| **AVERAGE** | **9** |  |  | **1.7** |  |  | **1.9** |  |  | **0.4** |  |  | **17** |  |  | **28** |  |  | **0** |  |  | **2** |  |  | **3** |  |  | **1** |  |  | **13** |  |  | **3** |  |  | **12** |  |  | **2** | |  |  | **45** |  |  | **2** |  |  | **3** |  |  | **3** |  |  | **17** |  |  | **320** |

L, litres; σ, standard deviation; n, sample size; TF, toilet flushing; SH, shower; WB, washbasin; KS, kitchen sink; WF, water filter; BM, bread machine; US, utility sink; TAP, tap; HW, hair washbasin; PS, pet shower; RB, retail building. In the bakery, WB T refers to toilet washbasin and WB SB refers to snack bar washbasin.
